# Supplementary material for: Mapping psychological distress, depression and anxiety measures to adolescent AQoL-6D utility using data from a sample of young people presenting to primary mental health services
Source: bioRxiv or medRxiv preprint supplement (doi:10.1101/2021.07.07.21260129), 2024-02-01
Supplement: Supplementary file [file media-1.pdf]

Mapping psychological distress, depression and anxiety measures to  
AQoL-6D utility using data from a sample of young people  
presenting to primary mental health services  
Online Supplement

## A Additional tables

Table A.1: 10-fold cross-validated model fitting index for different GLM and OLS models using PHQ-9 as predictor with the baseline data

| Model                                                   | Training model fit |       |       | Testing model fit |       |       |
|---------------------------------------------------------|--------------------|-------|-------|-------------------|-------|-------|
|                                                         | R2                 | RMSE  | MAE   | R2                | RMSE  | MAE   |
| <b>OLS</b>                                              |                    |       |       |                   |       |       |
| <b>No transformation</b>                                | 0.551              | 0.157 | 0.124 | 0.545             | 0.157 | 0.124 |
| <b>Complementary log log transformation</b>             | 0.542              | 0.159 | 0.123 | 0.536             | 0.159 | 0.124 |
| <b>Logit transformation</b>                             | 0.519              | 0.163 | 0.124 | 0.513             | 0.162 | 0.124 |
| <b>Log transformation</b>                               | 0.501              | 0.166 | 0.130 | 0.493             | 0.166 | 0.131 |
| <b>Log log transformation</b>                           | 0.484              | 0.169 | 0.128 | 0.477             | 0.168 | 0.128 |
| <b>GLM</b>                                              |                    |       |       |                   |       |       |
| <b>Gaussian distribution and log link</b>               | 0.536              | 0.160 | 0.126 | 0.530             | 0.160 | 0.126 |
| <b>Beta distribution and complementary log log link</b> | 0.551              | 0.157 | 0.124 | 0.545             | 0.157 | 0.124 |
| <b>Beta distribution and logit link</b>                 | 0.548              | 0.158 | 0.124 | 0.543             | 0.158 | 0.124 |

Results are averaged over ten folds. RMSE: Root Mean Squared Error; MAE: Mean Absolute Error

Table A.2: 10-fold cross-validated model fitting index for different candidate predictors estimated using GLM with Gaussian distribution and log link with the baseline data

| Model         | Training model fit |       |       | Testing model fit |       |       |
|---------------|--------------------|-------|-------|-------------------|-------|-------|
|               | R2                 | RMSE  | MAE   | R2                | RMSE  | MAE   |
| <b>PHQ-9</b>  | 0.536              | 0.160 | 0.126 | 0.530             | 0.160 | 0.126 |
| <b>OASIS</b>  | 0.450              | 0.174 | 0.139 | 0.450             | 0.174 | 0.139 |
| <b>BADS</b>   | 0.434              | 0.177 | 0.143 | 0.431             | 0.177 | 0.144 |
| <b>GAD-7</b>  | 0.428              | 0.178 | 0.144 | 0.425             | 0.177 | 0.144 |
| <b>K6</b>     | 0.397              | 0.182 | 0.143 | 0.395             | 0.182 | 0.143 |
| <b>SCARED</b> | 0.397              | 0.182 | 0.147 | 0.394             | 0.182 | 0.147 |

Results are averaged over ten folds. RMSE: Root Mean Squared Error; MAE: Mean Absolute Error

Table A.3: Estimated coefficients from utility mapping models based on individual candidate predictors with Social and Occupational Functioning Assessment Scale using GLMM (Gaussian distribution and log link)

| Parameter                 | Estimate | SE    | CI (95%)     | R2           | Sigma        |
|---------------------------|----------|-------|--------------|--------------|--------------|
| <b>PHQ-9 SOFAS model</b>  |          |       |              | <b>0.656</b> | <b>0.139</b> |
| SD (Intercept)            | 0.107    | 0.014 | 0.08, 0.13   |              |              |
| Intercept                 | -0.291   | 0.058 | -0.41, -0.17 |              |              |
| PHQ-9 baseline            | -4.268   | 0.115 | -4.50, -4.04 |              |              |
| PHQ-9 change              | -3.570   | 0.167 | -3.90, -3.24 |              |              |
| SOFAS baseline            | 0.421    | 0.078 | 0.27, 0.57   |              |              |
| SOFAS change              | 0.385    | 0.112 | 0.16, 0.61   |              |              |
| <b>OASIS SOFAS model</b>  |          |       |              | <b>0.684</b> | <b>0.133</b> |
| SD (Intercept)            | 0.158    | 0.011 | 0.14, 0.18   |              |              |
| Intercept                 | -0.665   | 0.062 | -0.78, -0.54 |              |              |
| OASIS baseline            | -5.468   | 0.179 | -5.82, -5.12 |              |              |
| OASIS change              | -5.076   | 0.256 | -5.59, -4.57 |              |              |
| SOFAS baseline            | 0.826    | 0.086 | 0.65, 0.99   |              |              |
| SOFAS change              | 0.655    | 0.106 | 0.45, 0.86   |              |              |
| <b>BADS SOFAS model</b>   |          |       |              | <b>0.642</b> | <b>0.141</b> |
| SD (Intercept)            | 0.171    | 0.011 | 0.15, 0.19   |              |              |
| Intercept                 | -1.681   | 0.060 | -1.80, -1.56 |              |              |
| BADS baseline             | 0.966    | 0.037 | 0.89, 1.04   |              |              |
| BADS change               | 0.736    | 0.046 | 0.64, 0.83   |              |              |
| SOFAS baseline            | 0.561    | 0.095 | 0.38, 0.75   |              |              |
| SOFAS change              | 0.597    | 0.120 | 0.36, 0.84   |              |              |
| <b>K6 SOFAS model</b>     |          |       |              | <b>0.590</b> | <b>0.152</b> |
| SD (Intercept)            | 0.149    | 0.016 | 0.12, 0.18   |              |              |
| Intercept                 | -0.645   | 0.068 | -0.78, -0.51 |              |              |
| K6 baseline               | -3.742   | 0.150 | -4.04, -3.45 |              |              |
| K6 change                 | -3.036   | 0.200 | -3.43, -2.65 |              |              |
| SOFAS baseline            | 0.834    | 0.091 | 0.66, 1.01   |              |              |
| SOFAS change              | 0.765    | 0.122 | 0.53, 1.00   |              |              |
| <b>SCARED SOFAS model</b> |          |       |              | <b>0.630</b> | <b>0.144</b> |
| SD (Intercept)            | 0.162    | 0.012 | 0.14, 0.18   |              |              |
| Intercept                 | -0.782   | 0.065 | -0.91, -0.65 |              |              |
| SCARED baseline           | -1.238   | 0.048 | -1.33, -1.14 |              |              |
| SCARED change             | -1.214   | 0.081 | -1.37, -1.06 |              |              |
| SOFAS baseline            | 0.995    | 0.089 | 0.82, 1.17   |              |              |

Table A.3: Estimated coefficients from utility mapping models based on individual candidate predictors with Social and Occupational Functioning Assessment Scale using GLMM (Gaussian distribution and log link) (*continued*)

| Parameter                | Estimate | SE    | CI (95%)     | R2           | Sigma        |
|--------------------------|----------|-------|--------------|--------------|--------------|
| SOFAS change             | 0.961    | 0.115 | 0.74, 1.19   |              |              |
| <b>GAD-7 SOFAS model</b> |          |       |              | <b>0.625</b> | <b>0.145</b> |
| SD (Intercept)           | 0.137    | 0.013 | 0.11, 0.16   |              |              |
| Intercept                | -0.753   | 0.061 | -0.88, -0.63 |              |              |
| GAD-7 baseline           | -4.209   | 0.143 | -4.49, -3.92 |              |              |
| GAD-7 change             | -3.669   | 0.206 | -4.07, -3.27 |              |              |
| SOFAS baseline           | 0.960    | 0.084 | 0.80, 1.13   |              |              |
| SOFAS change             | 0.739    | 0.116 | 0.51, 0.96   |              |              |

Note: The BADS, GAD-7, K6, OASIS, PHQ-9, SCARED and SOFAS parameters were first multiplied by 0.01.

Table A.4: Estimated coefficients from utility mapping models based on individual candidate predictors with Social and Occupational Functioning Assessment Scale using LMM (complementary log log transformation)

| Parameter                 | Estimate | SE    | CI (95%)       | R2           | Sigma        |
|---------------------------|----------|-------|----------------|--------------|--------------|
| <b>PHQ-9 SOFAS model</b>  |          |       |                | <b>0.767</b> | <b>0.406</b> |
| SD (Intercept)            | 0.348    | 0.017 | 0.31, 0.38     |              |              |
| Intercept                 | 0.428    | 0.129 | 0.17, 0.69     |              |              |
| PHQ-9 baseline            | -9.115   | 0.249 | -9.60, -8.62   |              |              |
| PHQ-9 change              | -7.331   | 0.339 | -8.01, -6.66   |              |              |
| SOFAS baseline            | 0.960    | 0.172 | 0.62, 1.29     |              |              |
| SOFAS change              | 1.146    | 0.235 | 0.67, 1.61     |              |              |
| <b>OASIS SOFAS model</b>  |          |       |                | <b>0.773</b> | <b>0.401</b> |
| SD (Intercept)            | 0.405    | 0.017 | 0.37, 0.44     |              |              |
| Intercept                 | -0.242   | 0.134 | -0.50, 0.02    |              |              |
| OASIS baseline            | -11.522  | 0.379 | -12.28, -10.77 |              |              |
| OASIS change              | -10.757  | 0.499 | -11.75, -9.78  |              |              |
| SOFAS baseline            | 1.621    | 0.183 | 1.26, 1.98     |              |              |
| SOFAS change              | 1.693    | 0.229 | 1.25, 2.15     |              |              |
| <b>BADS SOFAS model</b>   |          |       |                | <b>0.744</b> | <b>0.427</b> |
| SD (Intercept)            | 0.439    | 0.018 | 0.40, 0.47     |              |              |
| Intercept                 | -2.549   | 0.124 | -2.79, -2.31   |              |              |
| BADS baseline             | 2.069    | 0.080 | 1.91, 2.22     |              |              |
| BADS change               | 1.606    | 0.092 | 1.43, 1.79     |              |              |
| SOFAS baseline            | 1.258    | 0.207 | 0.85, 1.66     |              |              |
| SOFAS change              | 1.528    | 0.243 | 1.05, 2.00     |              |              |
| <b>K6 SOFAS model</b>     |          |       |                | <b>0.731</b> | <b>0.436</b> |
| SD (Intercept)            | 0.443    | 0.018 | 0.41, 0.48     |              |              |
| Intercept                 | -0.296   | 0.152 | -0.60, 0.00    |              |              |
| K6 baseline               | -8.161   | 0.333 | -8.80, -7.52   |              |              |
| K6 change                 | -6.364   | 0.381 | -7.12, -5.62   |              |              |
| SOFAS baseline            | 1.805    | 0.202 | 1.41, 2.21     |              |              |
| SOFAS change              | 1.990    | 0.244 | 1.51, 2.47     |              |              |
| <b>SCARED SOFAS model</b> |          |       |                | <b>0.736</b> | <b>0.432</b> |
| SD (Intercept)            | 0.419    | 0.018 | 0.38, 0.46     |              |              |
| Intercept                 | -0.615   | 0.137 | -0.88, -0.35   |              |              |
| SCARED baseline           | -2.654   | 0.101 | -2.85, -2.45   |              |              |
| SCARED change             | -2.774   | 0.162 | -3.09, -2.46   |              |              |
| SOFAS baseline            | 2.169    | 0.188 | 1.80, 2.53     |              |              |

Table A.4: Estimated coefficients from utility mapping models based on individual candidate predictors with Social and Occupational Functioning Assessment Scale using LMM (complementary log log transformation) (*continued*)

| Parameter                | Estimate | SE    | CI (95%)     | R2           | Sigma        |
|--------------------------|----------|-------|--------------|--------------|--------------|
| SOFAS change             | 2.337    | 0.236 | 1.87, 2.80   |              |              |
| <b>GAD-7 SOFAS model</b> |          |       |              | <b>0.745</b> | <b>0.425</b> |
| SD (Intercept)           | 0.406    | 0.018 | 0.37, 0.44   |              |              |
| Intercept                | -0.571   | 0.132 | -0.83, -0.31 |              |              |
| GAD-7 baseline           | -8.900   | 0.306 | -9.49, -8.29 |              |              |
| GAD-7 change             | -7.601   | 0.398 | -8.37, -6.81 |              |              |
| SOFAS baseline           | 2.111    | 0.182 | 1.75, 2.47   |              |              |
| SOFAS change             | 1.866    | 0.237 | 1.41, 2.33   |              |              |

Note: The BADS, GAD-7, K6, OASIS, PHQ-9, SCARED and SOFAS parameters were first multiplied by 0.01.
